# Supplementary material for: RETRACTED: HSP70–eIF4G Interaction Promotes Protein Synthesis and Cell Proliferation in Hepatocellular Carcinoma
Source: PubMed Central journal article supplement (PMC7464799; doi:10.3390/cancers12082262), 2020-08-13
Supplement: cancers-12-02262-s001.pdf [file cancers-12-02262-s001.pdf]

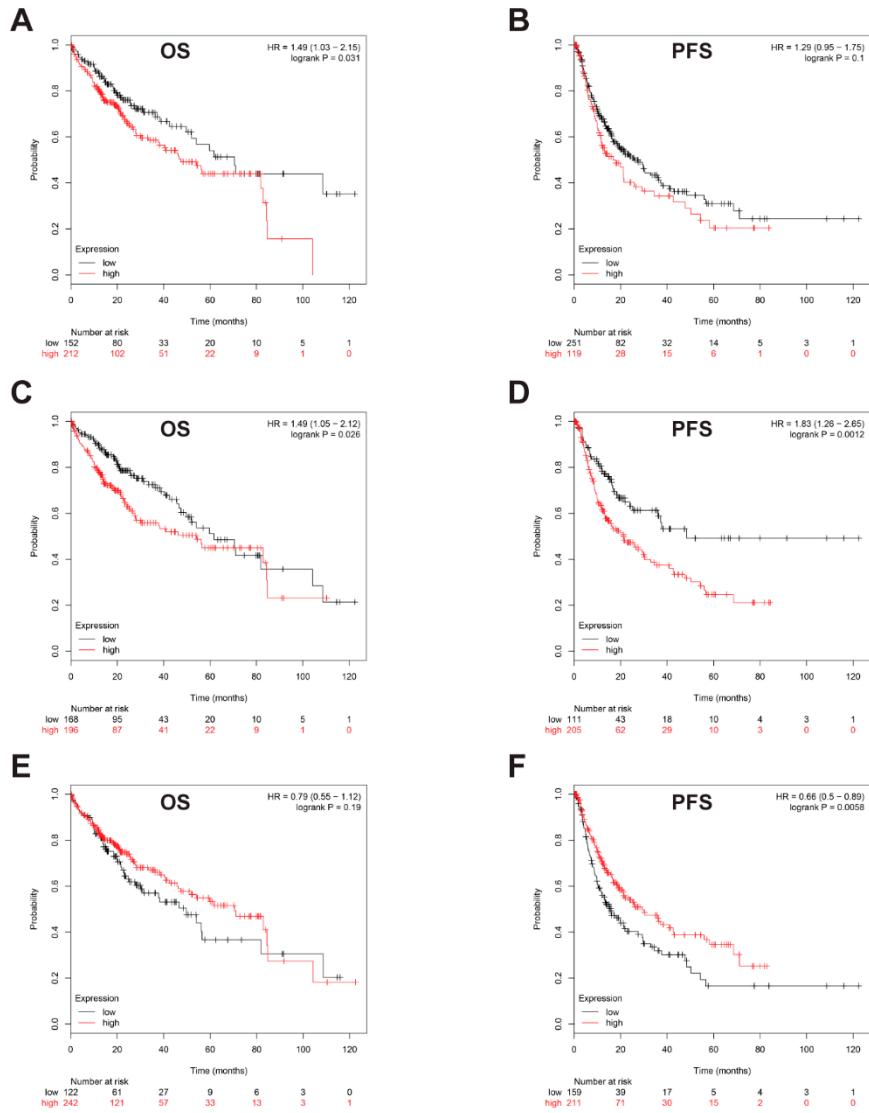

**Figure S1.** The effect of HSP70 and eIF4G mRNA expression on OS and PFS among HCC patients in the TCGA database. (A,B). Kaplan-Meier survival plots presenting OS and PFS in HCC tumor specimens based on HSPA1A expression. (C,D). Kaplan-Meier survival curves showing OS and PFS in HCC tumor specimens based on HSPA1B expression. (E,F). The OS and PFS curves of HCC patients were assessed according to eIF4G expression. *p* values were calculated using the log-rank test.

**A**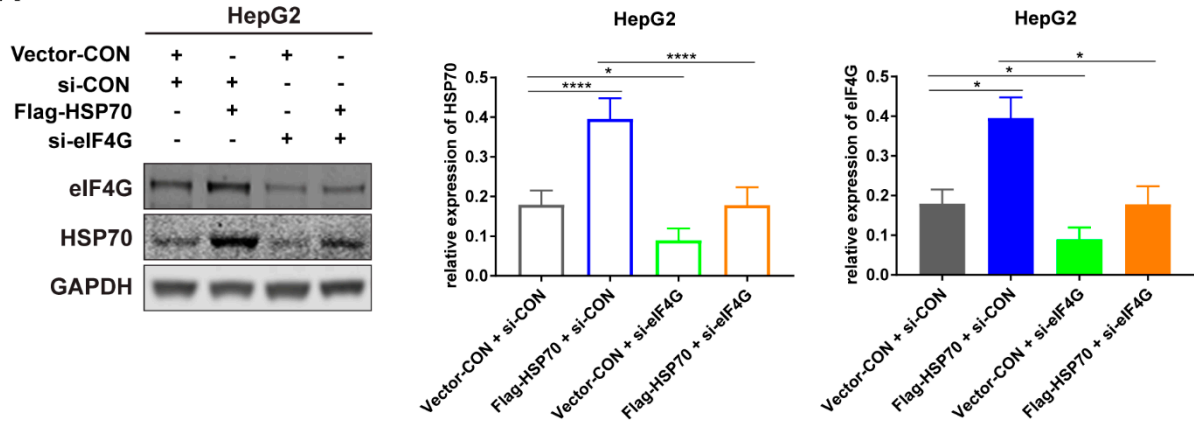**B**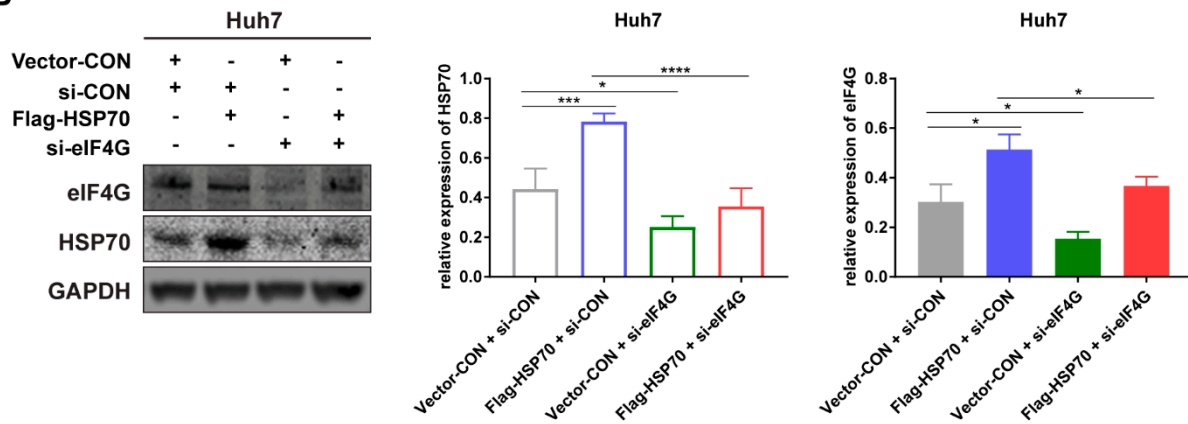

**Figure S2.** HSP70 interacts with eIF4G in vitro. (A, B). HepG2 and Huh7 cells were transfected with pCMV3-N-FLAG-HSP70 plasmid or eIF4G siRNA or co-transfected with pCMV3-N-FLAG-HSP70 plasmid and eIF4G siRNA. Protein expressions of HSP70 and eIF4G were measured by western blot. Data presented as mean  $\pm$  SD. \*  $p < 0.05$ , \*\*\*  $p < 0.001$ , \*\*\*\*  $p < 0.0001$  compared to corresponding control groups.

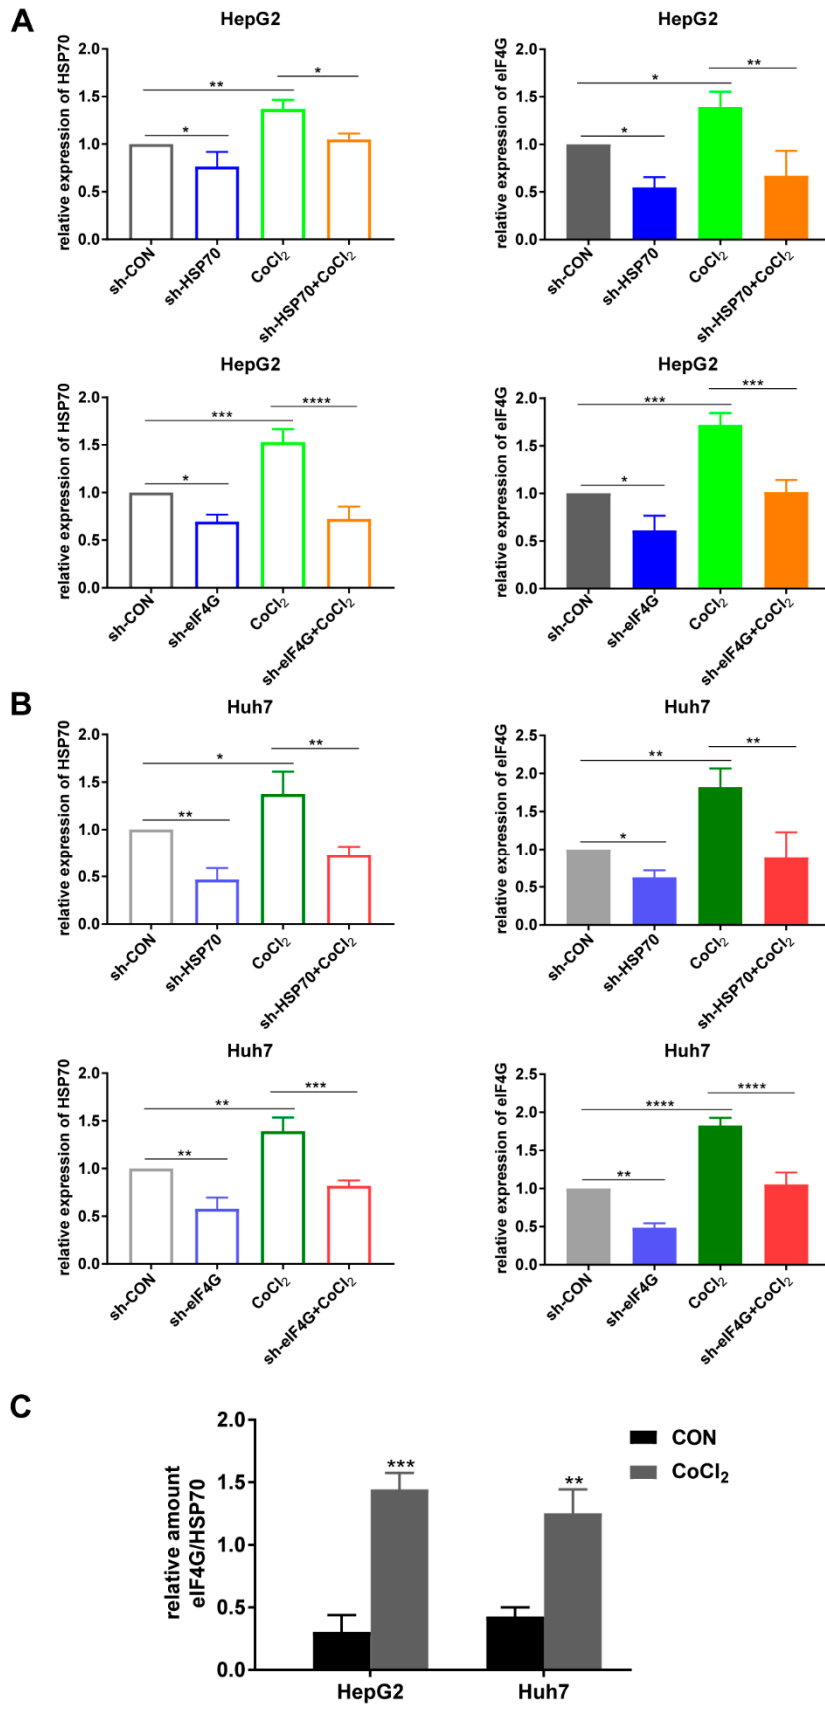

**Figure S3.** Quantitative data analysis of Figure 4B-D. (A). Quantitative data analysis of Figure 4B. (B). Quantitative data analysis of Figure 4C. (C). Quantitative data analysis of Figure 4D.

Related to Figure 3A

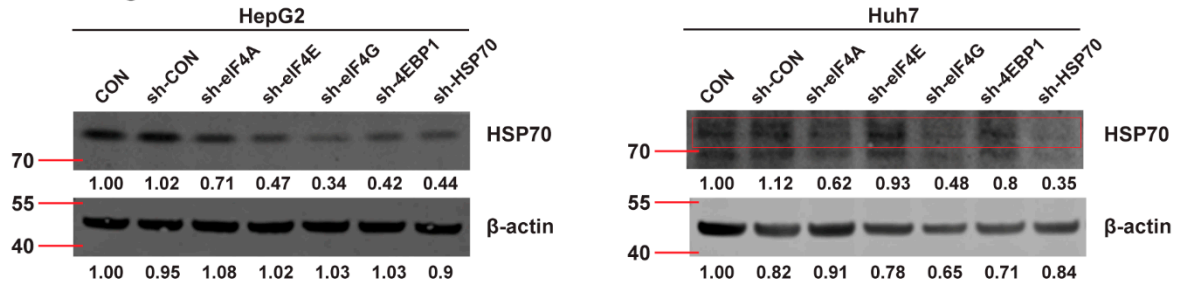

Related to Figure 3B

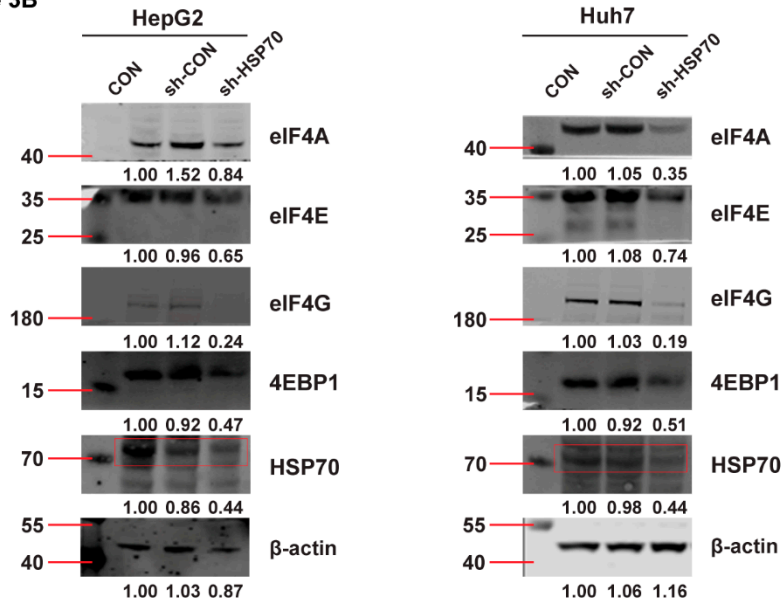

Related to Figure 3C

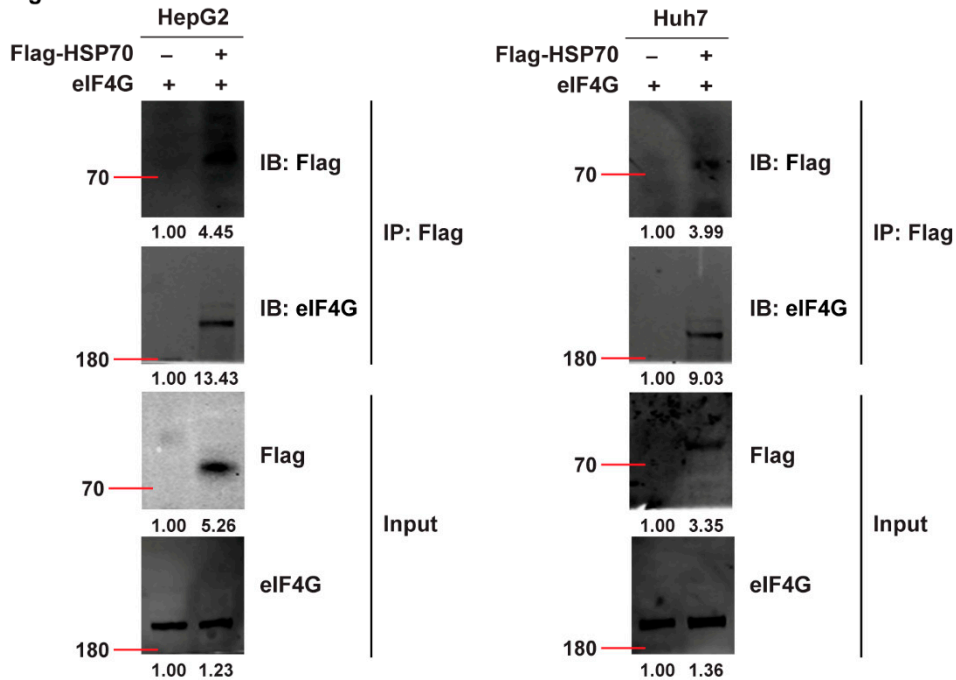

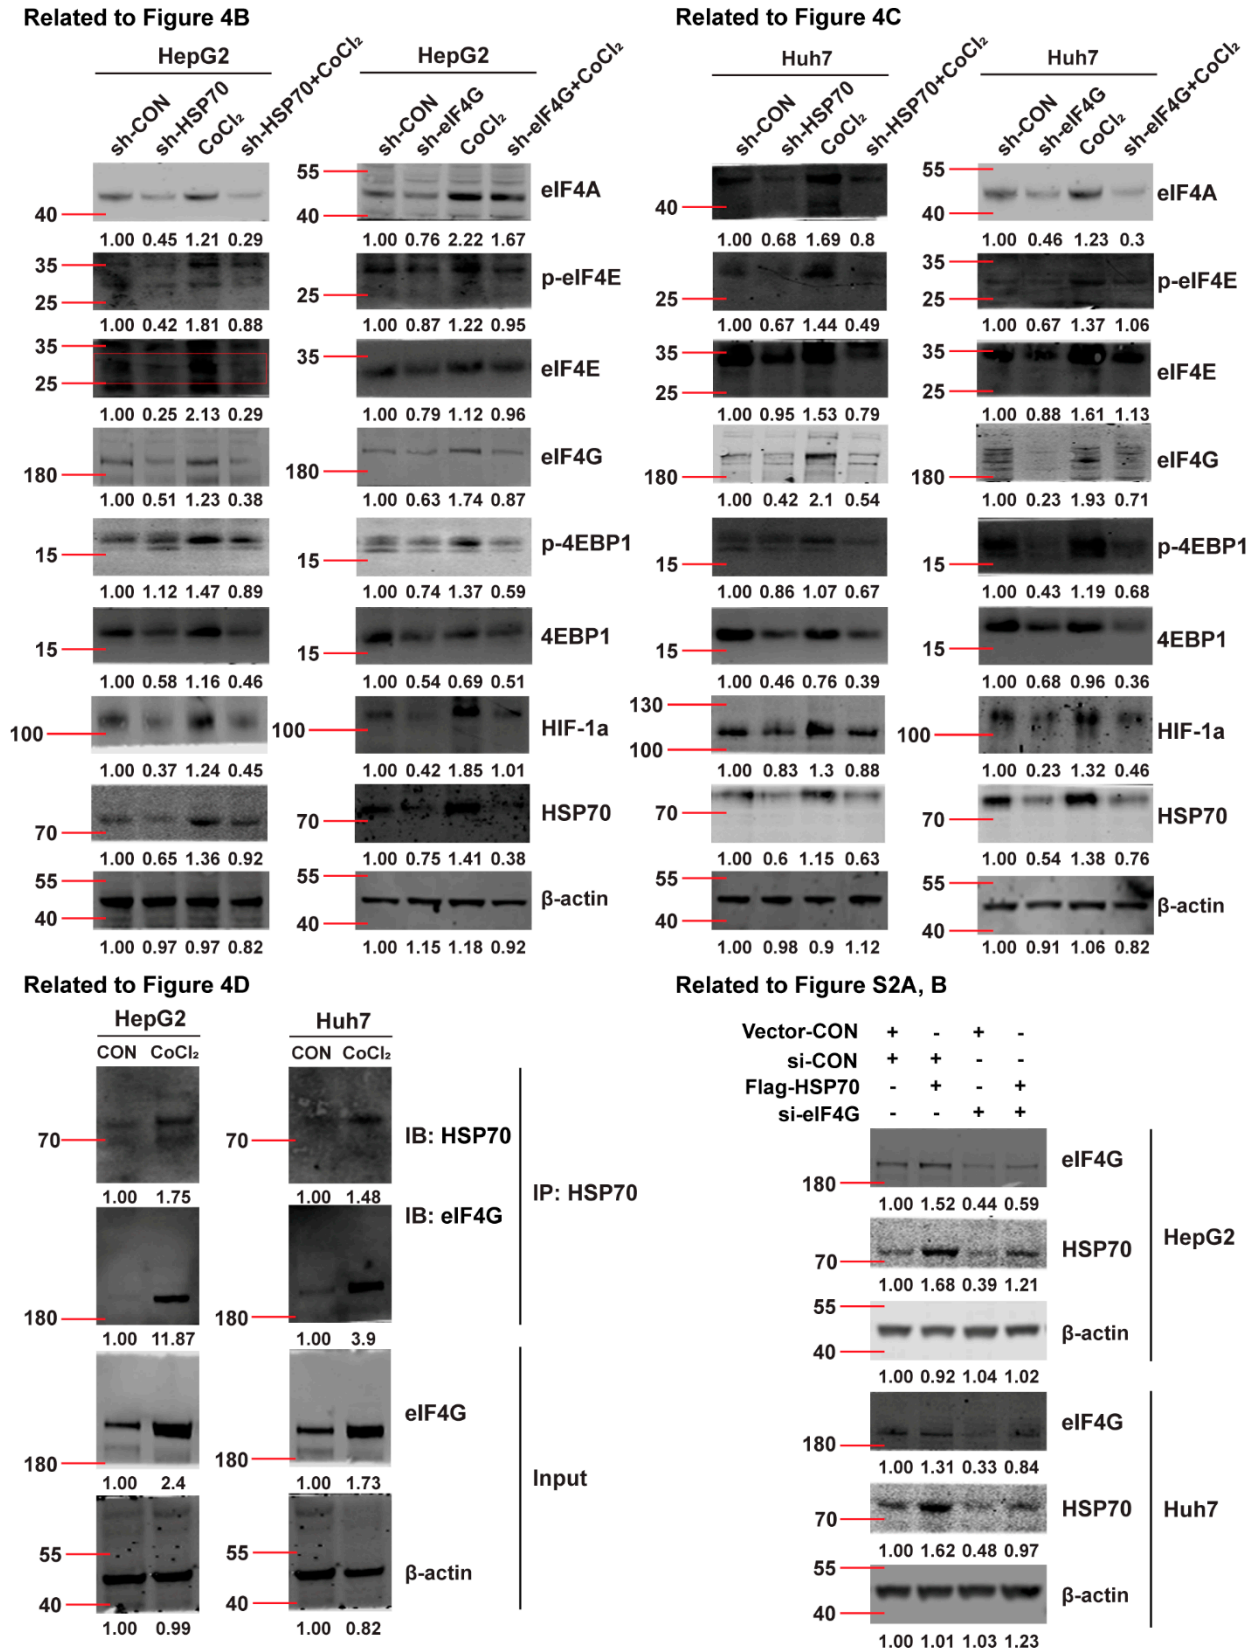

Figure S4. Raw data of western blots from Figure 3, 4 and S2.
